# Supplementary material for: Co-Expression Analysis of microRNAs and Proteins in Brain of Alzheimer’s Disease Patients
Source: MDPI journal article supplement (doi:10.3390/cells11010163), 2022-01-04
Supplement: s1 [file s1]

# Co-expression analysis of microRNAs and proteins in brain of Alzheimer's Disease patients

Callum N. Watson,<sup>1,†</sup> Ghazala Begum,<sup>1,†</sup> Emma Ashman,<sup>1</sup> Daniella Thorn,<sup>1</sup> Kamal M. Yakoub,<sup>1,2</sup>

Moustafa Al Hariri,<sup>3</sup> Ali Nehme,<sup>1</sup> Stefania Mondello,<sup>4</sup> Firas Kobeissy,<sup>5</sup> Antonio Belli,<sup>1,2</sup> Valentina Di Pietro<sup>1,2,\*</sup>

<sup>1</sup> Institute of Inflammation and Ageing, University of Birmingham, Edgbaston, Birmingham B15 2TT, UK; cal97@live.co.uk (C.N.W.); ghazalabegum@hotmail.com (G.B.); eka894@alumni.bham.ac.uk (E.A.); DXT882@student.bham.ac.uk (D.T.); k.yakoub@bham.ac.uk (K.M.Y.); ali.hassan.nehme@gmail.com (A.N.); a.belli@bham.ac.uk (A.B.)

<sup>2</sup> Surgical Reconstruction and Microbiology Research Centre, National Institute for Health Research, Queen Elizabeth Hospital, Birmingham B15 2TH, UK

<sup>3</sup> Department of Emergency Medicine, American University of Beirut Medical Center, Beirut 1107 2020, Lebanon; ma147@aub.edu.lb

<sup>4</sup> Department of Biomedical and Dental Sciences and Morphofunctional Imaging, University of Messina, 98165 Messina, Italy; stm\_mondello@hotmail.com

<sup>5</sup> Program for Neurotrauma, Neuroproteomics & Biomarkers Research, Departments of Emergency Medicine, Psychiatry, Neuroscience and Chemistry, University of Florida, Gainesville, FL 32611, USA; firasko@gmail.com

\* Correspondence: v.dipietro@bham.ac.uk

† These authors contributed equally.

**Table S1:** DE-miRNAs of Braak stage III-IV compared to Braak stage V-VI and p-values  $\leq 0.05$  are reported.

| MiRNAs          | Braak III-IV <i>vs</i> Braak V-VI |
|-----------------|-----------------------------------|
|                 | <i>p</i> -value                   |
| hsa-miR-185-3p  | 0.0079                            |
| hsa-miR-425-5p  | 0.0159                            |
| hsa-miR-425-3p  | 0.0079                            |
| hsa-miR-1539    | 0.0317                            |
| hsa-miR-212-3p  | 0.0317                            |
| hsa-let-7i-5p   | 0.0159                            |
| hsa-miR-185-5p  | 0.0159                            |
| hsa-miR-887-3p  | 0.0079                            |
| hsa-miR-503-5p  | 0.0317                            |
| hsa-miR-622     | 0.0317                            |
| hsa-miR-484     | 0.0317                            |
| hsa-miR-93-5p   | 0.0079                            |
| hsa-miR-877-5p  | 0.0159                            |
| hsa-miR-760     | 0.0159                            |
| hsa-miR-518a-3p | 0.0159                            |
| hsa-miR-874-3p  | 0.0079                            |
| hsa-miR-98-5p   | 0.0079                            |
| hsa-let-7a-5p   | 0.0079                            |
| hsa-let-7e-5p   | 0.0159                            |
| hsa-let-7d-5p   | 0.0079                            |

|                 |        |
|-----------------|--------|
| hsa-miR-106a-5p | 0.0079 |
| hsa-miR-181a-5p | 0.0317 |
| hsa-miR-125b-5p | 0.0159 |
| hsa-miR-331-3p  | 0.0317 |
| hsa-miR-487b-3p | 0.0317 |
| hsa-miR-129-5p  | 0.0159 |
| hsa-miR-130b-3p | 0.0317 |
| hsa-miR-296-5p  | 0.0159 |
| hsa-miR-216a-5p | 0.0317 |
| hsa-miR-370-3p  | 0.0317 |
| hsa-miR-330-5p  | 0.0159 |
| hsa-miR-433-3p  | 0.0317 |
| hsa-miR-1247-5p | 0.0079 |
| hsa-miR-550a-3p | 0.0079 |
| hsa-miR-489-3p  | 0.0317 |
| hsa-miR-151a-5p | 0.0317 |
| hsa-miR-338-3p  | 0.0317 |

**Table S2:** DE-proteins of Braak stage III-IV compared to Braak stage V-VI and adj.*p*-Val are reported.

| <b>Protein</b>        | <b>HGNC number</b> | <b>Braak III-IV <i>vs</i> Braak V-VI<br/>adj.<i>p</i>-Val</b> |
|-----------------------|--------------------|---------------------------------------------------------------|
| TNR11                 | TNFRSF11A          | 0.00055                                                       |
| COIA1<br>(endostatin) | COL18A1            | 2.7x10 <sup>-06</sup>                                         |
| CTGF                  | CTGF               | 0.00018                                                       |
| SP1                   | SP1                | 0.0014                                                        |
| KI2L2                 | KIR2DL2            | 0.00028                                                       |
| MYBA                  | MYBL1              | 0.00012                                                       |
| IL34_MOUSE            | Il34               | 0.00029                                                       |
| PGS2                  | DCN                | 0.0037                                                        |
| CSF3                  | CSF3               | 0.00022                                                       |
| I22R2                 | IL22RA2            | 0.045                                                         |
| POSTN                 | POSTN              | 0.0098                                                        |
| GLUC                  | GCG                | 0.015                                                         |
| BGH3                  | TGFBI              | 0.00029                                                       |
| SIGL9                 | SIGLEC9            | 0.0002                                                        |
| TSP1                  | THBS1              | 0.000056                                                      |
| A2AP                  | SERPINF2           | 0.0019                                                        |
| CCL28                 | CCL28              | 0.00023                                                       |
| JAK1                  | JAK1               | 0.017                                                         |
| CATB                  | CTSB               | 0.0039                                                        |
| LYAM2                 | SELE               | 0.0028                                                        |
| HLA-DR                |                    | 8.3x10 <sup>-06</sup>                                         |

|               |           |          |
|---------------|-----------|----------|
| GNLY          | GNLY      | 0.0028   |
| CNTF          | CNTF      | 0.000033 |
| ESR1          | ESR1      | 0.0002   |
| TNF11         | TNFSF11   | 0.029    |
| PD1L2         | PDCD1LG2  | 0.00012  |
| IFNG          | IFNG      | 0.00054  |
| CXCL9         | CXCL9     | 0.034    |
| VGFR2         | KDR       | 0.022    |
| LAG3          | LAG3      | 0.00018  |
| CDCP1         | CDCP1     | 0.00012  |
| IGKC          | IGKC      | 0.0012   |
| ITA2B (CD41a) | ITGA2B    | 0.00023  |
| EGLN          | ENG       | 0.000084 |
| NGAL          | LCN2      | 0.000099 |
| MK            | MDK       | 0.041    |
| THYG          | TG        | 0.00023  |
| KLK3          | KLK3      | 0.00023  |
| LEG9          | LGALS9    | 0.00055  |
| IL2RB         | IL2RB     | 0.002    |
| DAF           | CD55      | 0.00015  |
| ICAM1         | ICAM1     | 0.017    |
| NECT4         | NECTIN4   | 0.00036  |
| VTDB          | GC        | 0.00018  |
| CD72          | CD72      | 0.00055  |
| BCAM          | BCAM      | 0.000084 |
| CD44          | CD44      | 0.033    |
| P53           | TP53      | 0.00055  |
| CEAM5         | CEACAM5   | 0.00055  |
| SPA9          | SERPINA9  | 0.00061  |
| KLOTB         | KLB       | 0.00055  |
| MEP1A         | MEP1A     | 0.00022  |
| ULBP1         | ULBP1     | 0.0011   |
| CD22          | CD22      | 0.0024   |
| BLNK          | BLNK      | 0.0079   |
| CXL11         | CXCL11    | 0.005    |
| IL13_MOUSE    | Il13      | 0.045    |
| CAH9          | CA9       | 0.00012  |
| PTN1          | PTPN1     | 0.00046  |
| SLIP          | NUGGC     | 0.0079   |
| ULBP3         | ULBP3     | 0.00055  |
| CD52          | CD52      | 0.015    |
| IFNG          | IFNG      | 0.015    |
| TR11B         | TNFRSF11B | 0.0018   |
| B2MG          | B2M       | 0.018    |
| CREB1         | CREB1     | 0.0015   |
| CR2           | CR2       | 0.0013   |

|         |          |                       |
|---------|----------|-----------------------|
| TNFB    | LTA      | 0.00089               |
| EGLN    | ENG      | 0.002                 |
| IGLC1   | IGLC1    | 0.00065               |
| HLA-ABC |          | 8.3x10 <sup>-06</sup> |
| IL17C   | IL17C    | 0.0042                |
| FGF9    | FGF9     | 0.0021                |
| FPR1    | FPR1     | 0.0046                |
| UROK    | PLAU     | 0.0019                |
| AA2AR   | ADORA2A  | 0.0021                |
| TIE2    | TEK      | 0.015                 |
| ITAE    | ITGAE    | 0.017                 |
| IBP7    | IGFBP7   | 8.3x10 <sup>-06</sup> |
| FABPL   | FABP1    | 0.0021                |
| FCG2B   | FCGR2B   | 0.00064               |
| IFNL3   | IFNL3    | 0.0024                |
| DAND5   | DAND5    | 0.042                 |
| TNFL8   | TNFSF8   | 0.045                 |
| IBP7    | IGFBP7   | 0.00018               |
| ITA4    | ITGA4    | 0.011                 |
| WISP1   | WISP1    | 0.0076                |
| FINC    | FN1      | 0.018                 |
| LYVE1   | LYVE1    | 0.033                 |
| VGFR1   | FLT1     | 0.017                 |
| KAIN    | SERPINA4 | 0.028                 |
| CEAM1   | CEACAM1  | 0.04                  |
| NRP1    | NRP1     | 0.022                 |
| CCD50   | CCDC50   | 0.000099              |
| IL15    | IL15     | 0.043                 |
| EGFR    | EGFR     | 0.048                 |
| PARK7   | PARK7    | 0.00055               |
| GPI8    | PIGK     | 0.045                 |
| UBE2T   | UBE2T    | 0.02                  |
| BUB1    | BUB1     | 0.0019                |
| HGF     | HGF      | 0.043                 |
| LIMD1   | LIMD1    | 0.015                 |
| ANGL6   | ANGPTL6  | 0.019                 |
| SAA1    | SAA1     | 0.005                 |
| ANGL3   | ANGPTL3  | 0.0073                |
| ASTRA   | GRAMD1A  | 0.015                 |
| AKT3    | AKT3     | 0.004                 |
| HBEGF   | HBEGF    | 0.00044               |
| BIRC3   | BIRC3    | 0.035                 |
| HPT     | HP       | 0.005                 |
| CCR7    | CCR7     | 0.00064               |
| RA51C   | RAD51C   | 0.0011                |
| FGF23   | FGF23    | 0.0013                |

|       |          |         |
|-------|----------|---------|
| BARD1 | BARD1    | 0.033   |
| PRIO  | PRNP     | 0.00012 |
| PRIO  | PRNP     | 0.014   |
| A1AT  | SERPINA1 | 0.0084  |
| RP9   | RP9      | 0.03    |
| CO1A1 | COL1A1   | 0.0032  |
| CFLAR | CFLAR    | 0.023   |
| CRP   | CRP      | 0.024   |

## ELISA – protein validations

### Methods

#### *Protein preparation*

Human FN1 (fibronectin) and human EGFR (Epidermal growth factor receptor) ELISA kits (Wuhan Fine Biotech, Wuhan, China) were used for the validation of Sciomics assay. Proteins were extracted using the instructions of manufacturer's ELISA kit. These were then frozen with a protease inhibitor before analysis using ELISA kits.

A BCA protein assay (Pierce, ThermoFisher, Waltham, MA, USA ) was used to quantify the protein concentration after extraction with a standard curve. A linear regression line was used to make a standard curve to establish protein concentrations. Measurements were taken using a Tecan Infinite 200 Pro (Tecan, Männedorf, Switzerland).

An equal amount of protein was then added to the ELISA assay according the manufacturer's protocol.

#### *Protein Analysis*

An ELISA was carried out to quantify the FN1 and EGFR protein content within the samples.

A standard curve was used to identify the absorbance relevant for protein concentration. A sigmoidal curve was used to interpolate the points and enable the protein concentration to be calculated. Due to the data being non-normally distributed based on a Shapiro-Wilk test. The Mann-Whitney test was used to assess the differences between groups (controls and Braak stage V-VI).

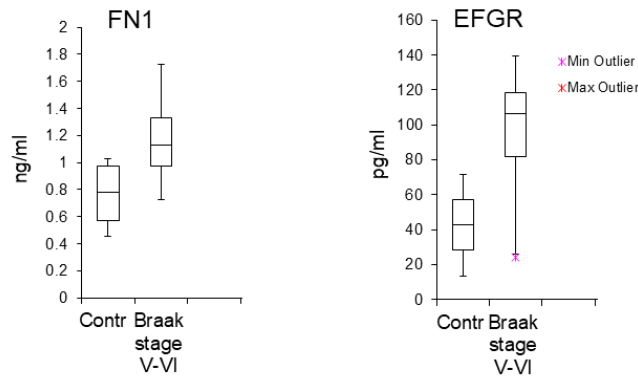

**Figure S1: FN1 and EFGR protein concentrations after ELISA quantification**

NO significant difference between control and Braak stage V-VI was found. However, there is an increase in the trend of both proteins when Braak stage V-VI samples are compared to controls, confirming and validating the Sciomic assay results.

**Table S3: DE-miRNAs of AD brain tissues identified in this study were compared to DE-miRNAs of different biofluids identified in literature**

( ↓ )= downregulation

( ↑ )= upregulation

| miRNAs      | Biofluids    | Reference                   | Watson et al. |
|-------------|--------------|-----------------------------|---------------|
| miR-146b-5p | Blood ↓      | Wu et al. 2020 [1]          | Brain ↓       |
| miR132      | Neural EVs ↓ | Cha et al. 2019 [2]         | Brain ↓       |
| miR-212     | Neural EVs ↓ | Cha et al. 2019 [2]         | Brain ↓       |
| miR-425     | PBMC ↑       | Ren et al. 2016 [3]         | Brain ↓       |
| miR-106b    | Serum ↓      | Madadi et al. 2020 [4]      | Brain ↓       |
| miR-222     | Serum ↓      | Zeng et al. 2017 [5]        | Brain ↓       |
| miR-222     | CSF ↑        | Marchegiani et al. 2019 [6] | Brain ↓       |

|             |          |                                   |         |
|-------------|----------|-----------------------------------|---------|
| miR-34c     | Plasma ↑ | Shi et al. 2020 [7]               | Brain ↓ |
| miR-34c     | Serum ↑  | Bhatnagar et al. 2014 [8]         | Brain ↓ |
| miR-210-3p  | Plasma ↑ | Siedlecki-Wullich et al. 2019 [9] | Brain ↓ |
| miR-545-3p  | Plasma ↓ | Cosin-Tomas et al. 2017 [10]      | Brain ↓ |
| Let-7i-5p   | Serum ↓  | Yuen et al. 2021 [11]             | Brain ↓ |
| miR-22-5p   | Serum ↑  | Yuen et al. 2021 [11]             | Brain ↓ |
| miR-210-3p  | Plasma ↑ | Yuen et al. 2021 [11]             | Brain ↓ |
| miR-106b-5p | Serum ↑  | Yuen et al. 2021 [11]             | Brain ↓ |
| miR-212-3p  | Blood ↓  | Yuen et al. 2021 [11]             | Brain ↓ |
| miR-545-3p  | Plasma ↓ | Yuen et al. 2021 [11]             | Brain ↓ |

#### Reference:

- 1) Wu, H. Z. Y.; Thalamuthu, A.; Cheng, L.; Fowler, C.; Masters, C. L.; Sachdev, P.; Mather, K.A.; the Australian Imaging Biomarkers and Lifestyle Flagship Study of Ageing. Differential blood miRNA expression in brain amyloid imaging-defined Alzheimer's disease and controls. *Alzheimers Res Ther.* **2020.** 12:59. 10.1186/s13195-020-00627-0
- 2) Cha, D. J.; Mengel, D.; Mustapic, M.; Liu, W.; Selkoe, D. J.; Kapogiannis, D.; Galasko, D.; Rissman, R.A.; Bennett, D.A.; Walsh, D.M. miR-212 and miR-132 Are Downregulated In Neurally Derived Plasma Exosomes Of Alzheimer's patients. *Front. Neurosci.* **2019.** 13:1208. 10.3389/fnins.2019.01208
- 3) Ren, R. J.; Zhang, Y. F.; Dammer, E. B.; Zhou, Y.; Wang, L.L.; Liu, X. H.; Feng, B.L.; Jiang, G.X.; Chen, S.D.; Wang, G.; Cheng, Q. Peripheral blood MicroRNA expression profiles in Alzheimer's disease: screening, validation, association with clinical phenotype and implications for molecular mechanism. *Mol Neurobiol.* **2016.** 53 5772–5781. 10.1007/s12035-015-9484-8
- 4) Madadi, S.; Saidijam, M.; Yavari, B.; Soleimani, M. Downregulation of serum miR-106b: a potential biomarker for Alzheimer disease. *Arch Physiol Biochem.* **2020.** 10.1080/13813455.2020.1734842
- 5) Zeng, Q.; Zou, L.; Qian, L.; Zhou, F.; Nie, H.; Yu, S.; Jiang, J.; Zhuang, A.; Wang, C.; Zhang, H. Expression of microRNA222 in serum of patients with Alzheimer's disease. *Mol Med Rep.* **2019.** 16 5575–5579. 10.3892/mmr.2017.7301
- 6) Marchegiani, F.; Matacchione, G.; Ramini, D.; Marcheselli, F.; Recchioni, R.; Casoli, T.; Mercuri, E.; Lazzarini, M.; Giorgetti, B.; Cameriere, V.; Paolini, S.; Paciaroni, L.; Rossi, T.; Galeazzi, R.; Lisa, R.; Bonfigli, A.; Procopio, A.D.; De Luca, M.; Pelliccioni, G.; Oliveri, F. Diagnostic

- performance of new and classic CSF biomarkers in age-related dementias. *Aging*. **2019**. 11, 2420–2429. doi: 10.18632/aging.101925
- 7) Shi, Z.; Zhang, K.; Zhou, H.; Jiang, L.; Xie, B.; Wang, R.; Xia, W.; Yin, Y.; Gao, Z.; Cui, D.; Zhang, R.; Xu, S. Increased miR-34c mediates synaptic deficits by targeting synaptotagmin 1 through ROS-JNK-p53 pathway in Alzheimer's disease. *Aging Cell*. **2020**. 19:e13125. doi: 10.1111/ace.13125
  - 8) Bhatnagar, S.; Chertkow, H.; Schipper, H. M.; Yuan, Z.; Shetty, V.; Jenkins, S.; Jones, T.; Wang, E. Increased microRNA-34c abundance in Alzheimer's disease circulating blood plasma. *Front Mol Neurosci*. **2019**. 7:2. doi: 10.3389/fnmol.2014.00002
  - 9) Siedlecki-Wullich, D., Catala-Solsona, J., Fabregas, C., Hernandez, I., Clarimon, J., Lleo, A.; Boada, M.; Saura, C.A.; Rodriguez-Alvarez, J.; Minano-Molina, A.J. Altered microRNAs related to synaptic function as potential plasma biomarkers for Alzheimer's disease. *Alzheimers Res Ther*. **2019**. 11:46. doi: 10.1186/s13195-019-0501-4
  - 10) Cosin-Tomas, M., Antonell, A., Llado, A., Alcolea, D., Fortea, J., Ezquerra, M., Lleo, A.; Marti, M.J.; Pallas, M.; Sanchez-Valle, R.; Molimuevo, J.L.; Sanfeliu, C.; Kaliman, P. Plasma miR-34a-5p and miR-545-3p as early biomarkers of Alzheimer's disease: potential and limitations. *Mol Neurobiol*. **2017**. 54, 5550–5562. doi: 10.1007/s12035-016-0088-8
  - 11) Yuen, S.C.; Liang, X.; Zhu, H.; Jia, Y.; Leung, S.W. Prediction of differentially expressed microRNAs in blood as potential biomarkers for Alzheimer's disease by meta-analysis and adaptive boosting ensemble learning. *Alzheimers Res Ther*. **2021**; 13(1):126. doi: 10.1186/s13195-021-00862-z.
